# Supplementary material for: Quantitative X-ray pair distribution function analysis of nanocrystalline calcium silicate hydrates: a contribution to the understanding of cement chemistry
Source: PubMed Central journal article supplement (PMC5294392; doi:10.1107/s1600576716017404), 2017-02-01
Supplement: j-50-00014-sup1.pdf [file j-50-00014-sup1.pdf]

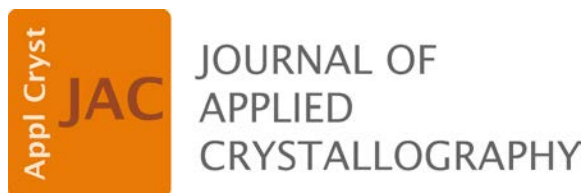

**Volume 49 (2016)**

**Supporting information for article:**

**Quantitative X-ray pair distribution function analysis of nanocrystalline calcium silicate hydrates: a contribution to the understanding of cement chemistry**

**Sylvain Grangeon, Alejandro Fernandez-Martinez, Alain Baronnet, Nicolas Marty, Agnieszka Poulain, Erik Elkaïm, Cédric Roosz, Stéphane Gaboreau, Pierre Henocq and Francis Claret**

**Table S1** All parameters refined during PDF data simulation but those reported in the main text. The corresponding input file is given in Figure S1.

| Target<br>Ca/Si ratio | Scale<br>factor | Delta2<br>( $\text{\AA}^2$ ) | Spdiameter<br>( $\text{\AA}$ ) | Ca and Si atoms                          |                             | O atoms                                  |                             |
|-----------------------|-----------------|------------------------------|--------------------------------|------------------------------------------|-----------------------------|------------------------------------------|-----------------------------|
|                       |                 |                              |                                | $u_{11}$ and $u_{22}$ ( $\text{\AA}^2$ ) | $u_{33}$ ( $\text{\AA}^2$ ) | $u_{11}$ and $u_{22}$ ( $\text{\AA}^2$ ) | $u_{33}$ ( $\text{\AA}^2$ ) |
| 0.6                   | 1.08            | 2.52                         | 28                             | 0.010                                    | 0.002                       | 0.004                                    | 0.04                        |
| 0.8                   | 1.17            | 2.54                         | 37                             | 0.006                                    | 0.008                       | 0.007                                    | 0.07                        |
| 1                     | 1.17            | 2.52                         | 41                             | 0.006                                    | 0.009                       | 0.007                                    | 0.06                        |
| 1.2                   | 1.18            | 2.52                         | 30                             | 0.005                                    | 0.008                       | 0.008                                    | 0.06                        |

Notes: delta2 is a quadratic atomic correlation factor.  $U_{33}$  associated to layer oxygen atoms are higher than the corresponding  $U_{11}$  and  $U_{22}$  values, certainly because the *c* lattice parameter was fixed during the modelling procedure so as to reduce the number of free parameters.

**Table S2** Detail of the four PDF simulations performed on C-S-H samples having a target Ca/Si of 1.2.

| Parameter                                         | Constraints on occupancy of Si sites |                      |                                              |                                                 |
|---------------------------------------------------|--------------------------------------|----------------------|----------------------------------------------|-------------------------------------------------|
|                                                   | Bridging sites refined               | Paired sites refined | Equal occupancy of bridging and paired sites | Bridging and paired sites refined independently |
| $a$ (Å)                                           | 6.685(8)                             | 6.678(8)             | 6.680(8)                                     | 6.683(8)                                        |
| Scale factor                                      | 1.16(6)                              | 1.25(7)              | 1.23(7)                                      | 1.18(7)                                         |
| Delta2 (Å <sup>2</sup> )                          | 2.5(1)                               | 2.5(1)               | 2.5(1)                                       | 2.5(1)                                          |
| Spdiameter (Å)                                    | 29(4)                                | 31(4)                | 31(4)                                        | 30(4)                                           |
| $z$ -coordinate of bridging Si <sup>§</sup>       | 0.065(4)                             | 0.067(1)             | 0.0678(2)                                    | 0.066(4)                                        |
| Ca and Si $U_{11}$ and $U_{22}$ (Å <sup>2</sup> ) | 0.005(1)                             | 0.006(1)             | 0.005(1)                                     | 0.005(1)                                        |
| Ca and Si $U_{33}$ (Å <sup>2</sup> )              | 0.007(3)                             | 0.011(4)             | 0.011(4)                                     | 0.008(3)                                        |
| O $U_{11}$ and $U_{22}$ (Å <sup>2</sup> )         | 0.007(5)                             | 0.007(2)             | 0.008(2)                                     | 0.008(2)                                        |
| O $U_{33}$ (Å <sup>2</sup> )                      | 0.06(1)                              | 0.06(1)              | 0.06(1)                                      | 0.06(1)                                         |
| Occupancy of bridging Si                          | 0.37(9)                              | 1*                   | 0.78(4) <sup>§</sup>                         | 0.45(11)                                        |
| Occupancy of paired Si                            | 1*                                   | 0.75(5)              | 0.78(4) <sup>§</sup>                         | 0.91(6)                                         |
| $R_{WP}$                                          | 32.70%                               | 34.66%               | 35.74%                                       | 32.41%                                          |

Notes: <sup>§</sup>Relative to the model given in Figure S1; \*fixed; <sup>§</sup>covaried

**Figure S1:** Typical PdfGUI input file used to model PDF patterns. Greyed parameters are those which were possibly refined (see main text and Table SI1).

### Phase Configuration

|       |         |      |         |       |        |
|-------|---------|------|---------|-------|--------|
| a     | 6.73907 | b    | 7.35343 | c     | 22.487 |
| alpha | 90.0    | beta | 90.0    | gamma | 123.25 |

  

|              |          |        |         |            |     |
|--------------|----------|--------|---------|------------|-----|
| Scale Factor | 0.972346 |        |         |            |     |
| delta1       | 0.0      | delta2 | 2.57498 | spdiameter | 0.0 |
| sratio       | 1.0      | rcut   | 0.0     | stepcut    | 0.0 |

  

Included Pairs

| elem | x  | y      | z      | u11    | u22        | u33        | u12        | u13 | u23 | occ |      |
|------|----|--------|--------|--------|------------|------------|------------|-----|-----|-----|------|
| 1    | Si | 0.9087 | 0.7531 | 0.0712 | 0.0026164  | 0.0026164  | 0.00799335 | 0.0 | 0.0 | 0.0 | 1.0  |
| 2    | Si | 0.9087 | 0.7531 | 0.9288 | 0.0026164  | 0.0026164  | 0.00799335 | 0.0 | 0.0 | 0.0 | 1.0  |
| 3    | Si | 0.4087 | 0.7531 | 0.5712 | 0.0026164  | 0.0026164  | 0.00799335 | 0.0 | 0.0 | 0.0 | 1.0  |
| 4    | Si | 0.4087 | 0.7531 | 0.4288 | 0.0026164  | 0.0026164  | 0.00799335 | 0.0 | 0.0 | 0.0 | 1.0  |
| 5    | O  | 0.771  | 0.5059 | 0.0942 | 0.00461025 | 0.00461025 | 0.0429663  | 0.0 | 0.0 | 0.0 | 1.0  |
| 6    | O  | 0.771  | 0.5059 | 0.9058 | 0.00461025 | 0.00461025 | 0.0429663  | 0.0 | 0.0 | 0.0 | 1.0  |
| 7    | O  | 0.271  | 0.5059 | 0.5942 | 0.00461025 | 0.00461025 | 0.0429663  | 0.0 | 0.0 | 0.0 | 1.0  |
| 8    | O  | 0.271  | 0.5059 | 0.4058 | 0.00461025 | 0.00461025 | 0.0429663  | 0.0 | 0.0 | 0.0 | 1.0  |
| 9    | O  | 0.759  | 0.178  | 0.1327 | 0.00461025 | 0.00461025 | 0.0429663  | 0.0 | 0.0 | 0.0 | 1.0  |
| 10   | O  | 0.759  | 0.178  | 0.8673 | 0.00461025 | 0.00461025 | 0.0429663  | 0.0 | 0.0 | 0.0 | 1.0  |
| 11   | O  | 0.259  | 0.178  | 0.6327 | 0.00461025 | 0.00461025 | 0.0429663  | 0.0 | 0.0 | 0.0 | 1.0  |
| 12   | O  | 0.259  | 0.178  | 0.3673 | 0.00461025 | 0.00461025 | 0.0429663  | 0.0 | 0.0 | 0.0 | 1.0  |
| 13   | O  | 0.985  | 0.5369 | 0.1982 | 0.00461025 | 0.00461025 | 0.0429663  | 0.0 | 0.0 | 0.0 | 1.0  |
| 14   | O  | 0.985  | 0.5369 | 0.8018 | 0.00461025 | 0.00461025 | 0.0429663  | 0.0 | 0.0 | 0.0 | 1.0  |
| 15   | O  | 0.485  | 0.5369 | 0.6982 | 0.00461025 | 0.00461025 | 0.0429663  | 0.0 | 0.0 | 0.0 | 1.0  |
| 16   | O  | 0.485  | 0.5369 | 0.3018 | 0.00461025 | 0.00461025 | 0.0429663  | 0.0 | 0.0 | 0.0 | 1.0  |
| 17   | O  | 0.519  | 0.3063 | 0.1942 | 0.00461025 | 0.00461025 | 0.0429663  | 0.0 | 0.0 | 0.0 | 1.0  |
| 18   | O  | 0.519  | 0.3063 | 0.8058 | 0.00461025 | 0.00461025 | 0.0429663  | 0.0 | 0.0 | 0.0 | 1.0  |
| 19   | O  | 0.019  | 0.3063 | 0.6942 | 0.00461025 | 0.00461025 | 0.0429663  | 0.0 | 0.0 | 0.0 | 1.0  |
| 20   | O  | 0.019  | 0.3063 | 0.3058 | 0.00461025 | 0.00461025 | 0.0429663  | 0.0 | 0.0 | 0.0 | 1.0  |
| 21   | O  | 0.894  | 0.746  | 0.0    | 0.00461025 | 0.00461025 | 0.0429663  | 0.0 | 0.0 | 0.0 | 1.0  |
| 22   | O  | 0.394  | 0.746  | 0.5    | 0.00461025 | 0.00461025 | 0.0429663  | 0.0 | 0.0 | 0.0 | 1.0  |
| 23   | O  | 0.188  | 0.893  | 0.094  | 0.00461025 | 0.00461025 | 0.0429663  | 0.0 | 0.0 | 0.0 | 1.0  |
| 24   | O  | 0.188  | 0.893  | 0.906  | 0.00461025 | 0.00461025 | 0.0429663  | 0.0 | 0.0 | 0.0 | 1.0  |
| 25   | O  | 0.688  | 0.893  | 0.594  | 0.00461025 | 0.00461025 | 0.0429663  | 0.0 | 0.0 | 0.0 | 1.0  |
| 26   | O  | 0.688  | 0.893  | 0.406  | 0.00461025 | 0.00461025 | 0.0429663  | 0.0 | 0.0 | 0.0 | 1.0  |
| 27   | O  | 0.27   | 0.434  | 0.0939 | 0.00461025 | 0.00461025 | 0.0429663  | 0.0 | 0.0 | 0.0 | 1.0  |
| 28   | O  | 0.27   | 0.434  | 0.9061 | 0.00461025 | 0.00461025 | 0.0429663  | 0.0 | 0.0 | 0.0 | 1.0  |
| 29   | O  | 0.77   | 0.434  | 0.5939 | 0.00461025 | 0.00461025 | 0.0429663  | 0.0 | 0.0 | 0.0 | 1.0  |
| 30   | O  | 0.77   | 0.434  | 0.4061 | 0.00461025 | 0.00461025 | 0.0429663  | 0.0 | 0.0 | 0.0 | 1.0  |
| 31   | O  | 0.77   | 0.86   | 0.0951 | 0.00461025 | 0.00461025 | 0.0429663  | 0.0 | 0.0 | 0.0 | 1.0  |
| 32   | O  | 0.77   | 0.86   | 0.9049 | 0.00461025 | 0.00461025 | 0.0429663  | 0.0 | 0.0 | 0.0 | 1.0  |
| 33   | O  | 0.27   | 0.86   | 0.5951 | 0.00461025 | 0.00461025 | 0.0429663  | 0.0 | 0.0 | 0.0 | 1.0  |
| 34   | O  | 0.27   | 0.86   | 0.4049 | 0.00461025 | 0.00461025 | 0.0429663  | 0.0 | 0.0 | 0.0 | 1.0  |
| 35   | O  | 0.523  | 0.811  | 0.1951 | 0.00461025 | 0.00461025 | 0.0429663  | 0.0 | 0.0 | 0.0 | 1.0  |
| 36   | O  | 0.523  | 0.811  | 0.8049 | 0.00461025 | 0.00461025 | 0.0429663  | 0.0 | 0.0 | 0.0 | 1.0  |
| 37   | O  | 0.023  | 0.811  | 0.6951 | 0.00461025 | 0.00461025 | 0.0429663  | 0.0 | 0.0 | 0.0 | 1.0  |
| 38   | O  | 0.023  | 0.811  | 0.3049 | 0.00461025 | 0.00461025 | 0.0429663  | 0.0 | 0.0 | 0.0 | 1.0  |
| 39   | O  | 0.987  | 0.0459 | 0.1985 | 0.00461025 | 0.00461025 | 0.0429663  | 0.0 | 0.0 | 0.0 | 1.0  |
| 40   | O  | 0.987  | 0.0459 | 0.8015 | 0.00461025 | 0.00461025 | 0.0429663  | 0.0 | 0.0 | 0.0 | 1.0  |
| 41   | O  | 0.487  | 0.0459 | 0.6985 | 0.00461025 | 0.00461025 | 0.0429663  | 0.0 | 0.0 | 0.0 | 1.0  |
| 42   | O  | 0.487  | 0.0459 | 0.3015 | 0.00461025 | 0.00461025 | 0.0429663  | 0.0 | 0.0 | 0.0 | 1.0  |
| 43   | Si | 0.7581 | 0.3862 | 0.1574 | 0.0026164  | 0.0026164  | 0.00799335 | 0.0 | 0.0 | 0.0 | 1.0  |
| 44   | Si | 0.7581 | 0.3862 | 0.8426 | 0.0026164  | 0.0026164  | 0.00799335 | 0.0 | 0.0 | 0.0 | 1.0  |
| 45   | Si | 0.2581 | 0.3862 | 0.6574 | 0.0026164  | 0.0026164  | 0.00799335 | 0.0 | 0.0 | 0.0 | 1.0  |
| 46   | Si | 0.2581 | 0.3862 | 0.3426 | 0.0026164  | 0.0026164  | 0.00799335 | 0.0 | 0.0 | 0.0 | 1.0  |
| 47   | Si | 0.7592 | 0.9697 | 0.1577 | 0.0026164  | 0.0026164  | 0.00799335 | 0.0 | 0.0 | 0.0 | 1.0  |
| 48   | Si | 0.7592 | 0.9697 | 0.8423 | 0.0026164  | 0.0026164  | 0.00799335 | 0.0 | 0.0 | 0.0 | 1.0  |
| 49   | Si | 0.2592 | 0.9697 | 0.6577 | 0.0026164  | 0.0026164  | 0.00799335 | 0.0 | 0.0 | 0.0 | 1.0  |
| 50   | Si | 0.2592 | 0.9697 | 0.3423 | 0.0026164  | 0.0026164  | 0.00799335 | 0.0 | 0.0 | 0.0 | 1.0  |
| 51   | Ca | 0.2651 | 0.4328 | 0.2056 | 0.0026164  | 0.0026164  | 0.00799335 | 0.0 | 0.0 | 0.0 | 1.0  |
| 52   | Ca | 0.2651 | 0.4328 | 0.7944 | 0.0026164  | 0.0026164  | 0.00799335 | 0.0 | 0.0 | 0.0 | 1.0  |
| 53   | Ca | 0.7651 | 0.4328 | 0.7056 | 0.0026164  | 0.0026164  | 0.00799335 | 0.0 | 0.0 | 0.0 | 1.0  |
| 54   | Ca | 0.7651 | 0.4328 | 0.2944 | 0.0026164  | 0.0026164  | 0.00799335 | 0.0 | 0.0 | 0.0 | 1.0  |
| 55   | Ca | 0.7499 | 0.9228 | 0.2935 | 0.0026164  | 0.0026164  | 0.00799335 | 0.0 | 0.0 | 0.0 | 1.0  |
| 56   | Ca | 0.7499 | 0.9228 | 0.7065 | 0.0026164  | 0.0026164  | 0.00799335 | 0.0 | 0.0 | 0.0 | 1.0  |
| 57   | Ca | 0.2499 | 0.9228 | 0.7935 | 0.0026164  | 0.0026164  | 0.00799335 | 0.0 | 0.0 | 0.0 | 1.0  |
| 58   | Ca | 0.2499 | 0.9228 | 0.2065 | 0.0026164  | 0.0026164  | 0.00799335 | 0.0 | 0.0 | 0.0 | 1.0  |
| 59   | O  | 0.427  | 0.219  | 0.0    | 0.0524101  | 0.0524101  | 0.228507   | 0.0 | 0.0 | 0.0 | 0.25 |
| 60   | O  | 0.927  | 0.219  | 0.5    | 0.0524101  | 0.0524101  | 0.228507   | 0.0 | 0.0 | 0.0 | 0.25 |
| 61   | O  | 0.879  | 0.237  | 0.0    | 0.0524101  | 0.0524101  | 0.228507   | 0.0 | 0.0 | 0.0 | 0.25 |
| 62   | O  | 0.379  | 0.237  | 0.5    | 0.0524101  | 0.0524101  | 0.228507   | 0.0 | 0.0 | 0.0 | 0.25 |
| 63   | O  | 0.422  | 0.8    | 0.0    | 0.0524101  | 0.0524101  | 0.228507   | 0.0 | 0.0 | 0.0 | 0.25 |
| 64   | O  | 0.922  | 0.8    | 0.5    | 0.0524101  | 0.0524101  | 0.228507   | 0.0 | 0.0 | 0.0 | 0.25 |
